# Supplementary material for: Investigation on the photoluminescence and thermoluminescence of BaGa2O4:Bi3+ at extremely low temperatures
Source: Royal Society of Chemistry journal article supplement (doi:10.1039/d0tc05122e), 2020-12-23
Supplement: d0tc05122e1.pdf [file d0tc05122e1.pdf]

## Supporting Information

### Investigation on photoluminescence and long persistent luminescence at extremely low temperature of BaGa<sub>2</sub>O<sub>4</sub>:Bi<sup>3+</sup>

Huimin Li,<sup>a</sup> Haiyan Wu,<sup>a, b</sup> Ran Pang,<sup>\*a</sup> Guanyu Liu,<sup>a</sup> Su Zhang,<sup>a</sup> Lihong Jiang,<sup>a</sup> Da Li,<sup>a</sup> Chengyu Li,<sup>\*a, b</sup> Jing

Feng<sup>a</sup> and Hongjie Zhang<sup>a</sup>

<sup>a</sup> State key Laboratory of Rare Earth Resource Utilization, Changchun Institute of Applied Chemistry, Chinese

Academy of Sciences, Changchun 130022, P. R. China.

<sup>b</sup> University of Science and Technology of China Hefei 230026, China

\* Corresponding author: Tel.: +86-0431-85262258

E-mail address: cyli@ciac.ac.cn and pangran@ciac.ac.cn

**Table S1** Rietveld refinement and lattice parameters of BaGa<sub>2</sub>O<sub>4</sub>:0.02Bi<sup>3+</sup>.

| Formula             | BaGa <sub>2</sub> O <sub>4</sub> :0.02Bi <sup>3+</sup> |
|---------------------|--------------------------------------------------------|
| Space group         | P-63(173)                                              |
| a = b (Å)           | 18.624645                                              |
| c (Å)               | 8.658551                                               |
| $\alpha = \beta$    | 90                                                     |
| $\gamma$            | 120                                                    |
| Units, Z            | 24                                                     |
| V (Å <sup>3</sup> ) | 2601.096                                               |
| R <sub>p</sub> (%)  | 7.51                                                   |
| R <sub>wp</sub> (%) | 9.82                                                   |
| $\chi^2$            | 3.252                                                  |

**Table S2** Lattice parameters and atom positions BaGa<sub>2</sub>O<sub>4</sub>:0.02Bi<sup>3+</sup>.

| NO. | Element | Sites | x       | y        | z        | Occ. | U      |
|-----|---------|-------|---------|----------|----------|------|--------|
| 1   | Ba      | Ba1   | 0       | 0        | 0.18533  | 1    | 0.04   |
| 2   | Ba      | Ba2   | 0.16163 | 0.8284   | 0.16038  | 1    | 0.024  |
| 3   | Ba      | Ba3   | 0.32882 | 0.18843  | 0.16906  | 1    | 0.024  |
| 4   | Ba      | Ba4   | 0.33333 | 0.66667  | 0.15732  | 1    | 0.029  |
| 5   | Ba      | Ba5   | 0.33333 | 0.66667  | 0.64893  | 1    | 0.033  |
| 6   | Ba      | Ba6   | 0.4859  | -0.00226 | 0.67502  | 1    | 0.043  |
| 7   | Ga      | Ga1   | 0.15784 | 0.16563  | 0.46937  | 1    | 0.006  |
| 8   | Ga      | Ga2   | 0.17406 | 0.01851  | 0.36792  | 1    | -0.005 |
| 9   | Ga      | Ga3   | 0.33429 | 0.00578  | 0.36694  | 1    | 0.008  |
| 10  | Ga      | Ga4   | 0.33333 | 0.00182  | -0.04029 | 1    | 0.021  |
| 11  | Ga      | Ga5   | 0.32733 | 0.82832  | -0.0299  | 1    | 0.025  |
| 12  | Ga      | Ga6   | 0.34499 | 0.82721  | 0.36474  | 1    | 0.027  |
| 13  | Ga      | Ga7   | 0.50081 | 0.16409  | -0.03257 | 1    | 0.041  |
| 14  | Ga      | Ga8   | 0.49557 | 0.16533  | 0.3612   | 1    | 0.063  |
| 15  | O       | O1    | 0.38792 | 0.77105  | 0.86908  | 1    | -0.053 |
| 16  | O       | O2    | 0.10239 | 0.8948   | 0.36382  | 1    | -0.042 |
| 17  | O       | O3    | 0.10189 | 0.04465  | 0.43708  | 1    | 0.016  |
| 18  | O       | O4    | 0.21856 | -0.03854 | -0.07896 | 1    | 0.005  |
| 19  | O       | O5    | 0.24277 | 0.00741  | 0.45275  | 1    | -0.062 |
| 20  | O       | O6    | 0.26886 | 0.74393  | 0.3369   | 1    | 0.119  |
| 21  | O       | O7    | 0.15499 | 0.06666  | 0.14897  | 1    | -0.004 |
| 22  | O       | O8    | 0.27946 | 0.88856  | 0.42785  | 1    | -0.052 |
| 23  | O       | O9    | 0.55359 | -0.04456 | 0.55077  | 1    | 0.231  |
| 24  | O       | O10   | 0.37883 | -0.06046 | 0.87409  | 1    | -0.08  |
| 25  | O       | O11   | 0.35939 | 0.83754  | -0.02028 | 1    | -0.018 |
| 26  | O       | O12   | 0.31021 | 0.14564  | 0.90198  | 1    | -0.048 |
| 27  | O       | O13   | 0.42488 | 0.5657   | 0.48466  | 1    | -0.057 |
| 28  | O       | O14   | 0.48343 | 0.1758   | 0.14576  | 1    | -0.012 |
| 29  | O       | O15   | 0.33746 | 0.01351  | 0.1297   | 1    | 0.025  |
| 30  | O       | O16   | 0.33333 | 0.17457  | 0.54658  | 1    | -0.06  |

**Table S3** Fitting parameters of TL spectra.

| Traps | Peak Position | Peak Height | Peak Area |
|-------|---------------|-------------|-----------|
| 1     | 185.24        | 692765      | 1.51E+07  |
| 2     | 401.377       | 9.92E+06    | 5.14E+08  |
| 3     | 475.068       | 6.97E+06    | 5.02E+08  |
| 4     | 596.553       | 1.52E+06    | 1.78E+08  |
| 5     | 687.731       | 784599      | 9.98E+07  |

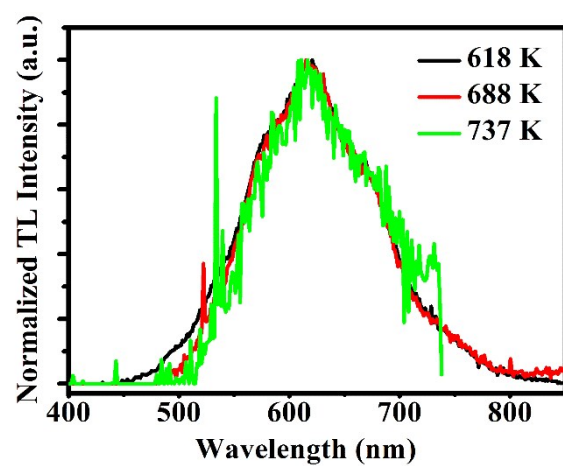

**Fig. S1** TL spectra monitored at 618, 688 and 737 K.
